# Supplementary material
Source: Royal Society of Chemistry journal article supplement (doi:10.1039/d6cp00719h)
Supplement: d6cp00719h1.pdf [file d6cp00719h1.pdf]

## Supplementary Information:

# Resonance Enhanced MultiPhoton Ionization studies of di-ortho-methoxy methylcinnamate, a cinnamate-based UV-B filter

Ivan Romanov<sup>1</sup>, Michael Hymas<sup>2</sup>, Jack Dalton<sup>2</sup>, Vasilios G. Stavros<sup>2</sup> and  
Wybren Jan Buma<sup>1,3\*</sup>,

<sup>1</sup> *Van't Hoff Institute for Molecular Sciences, University of Amsterdam, Science Park 904,  
1098 XH Amsterdam, The Netherlands*

<sup>2</sup> *School of Chemistry, University of Birmingham, Edgbaston, B15 2TT, United Kingdom*

<sup>3</sup> *Institute for Molecules and Materials, FELIX Laboratory, Radboud University, 6525 ED  
Nijmegen, The Netherlands*

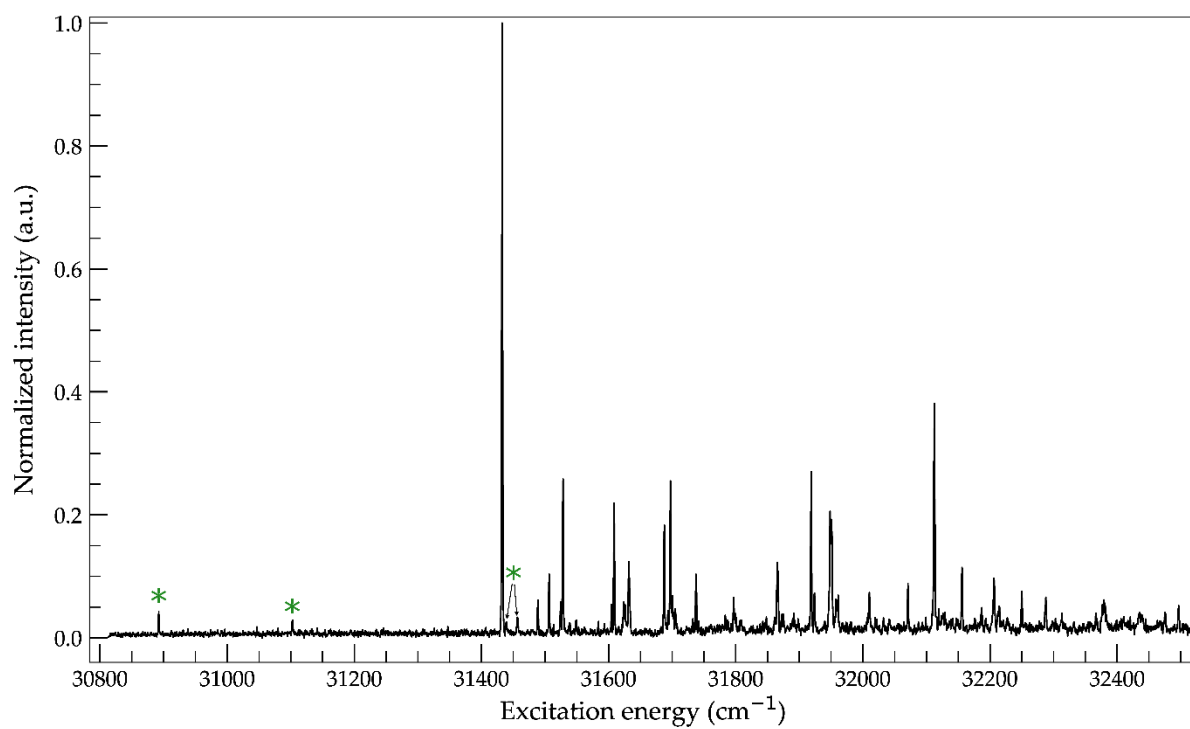

**Figure S1.** Extended jet-cooled excitation spectrum of di-ortho-methoxy methylcinnamate (**1**) recorded by two-colour (1+1') R2PI spectroscopy. Bands indicated with an \* are assigned to resonances of **1**-H<sub>2</sub>O clusters.

**Table S1.** Composition wavefunctions  $V'(\pi\pi^*)$  and  $V(\pi\pi^*)$  states of *s-cis* and *s-trans* conformations of di-*ortho*-methoxy cinnamate at  $S_0$  equilibrium geometry (vertical) and at the equilibrium geometry of the respective electronically excited state (adiabatic). HOMO and LUMO are abbreviated as H and L.

|                | Vertical<br><i>s-cis</i>                   | Adiabatic<br><i>s-cis</i> <sup>a</sup>     | Vertical<br><i>s-trans</i>                 | Adiabatic<br><i>s-trans</i> <sup>a</sup>   |
|----------------|--------------------------------------------|--------------------------------------------|--------------------------------------------|--------------------------------------------|
| $V'(\pi\pi^*)$ | H-1→L 0.62<br>H → L -0.28<br>H → L+1 -0.17 | H-1→L 0.62<br>H → L -0.30<br>H → L+1 -0.13 | H-1→L 0.66<br>H → L -0.18<br>H → L+1 -0.18 | H-1→L 0.65<br>H → L -0.23<br>H → L+1 -0.13 |
| $V(\pi\pi^*)$  | H-1→L 0.27<br>H → L 0.64                   |                                            | H-1→L 0.18<br>H → L 0.68                   |                                            |

<sup>a</sup> Geometry optimization of the  $V(\pi\pi^*)$  state does not lead to a stable minimum.
